# Supplementary material for: Microbial Consortium Applications Can Affect Quality and Primary Metabolism of Processing Tomato
Source: Preprints.org preprint supplement (doi:10.20944/preprints202211.0101.v1), 2022-11-07
Supplement: Supplementary file 1 [file Supplementary Table.docx]

**Table S1.** Detailed composition of commercial formulations containing different microbial consortia.

| **Commercial Product** | **Composition** | **%** |
| --- | --- | --- |
| **Micosat F Tab Plus**  **(MIC)** | Mycorrhizal fungi (*Glomus coronatum* GU 53, *G. caledonium* GM 24, *G. mosseae* GP 11 e *G. viscosum* GC 41, *Rhizophagus irregularis* RI 31) | 10.0% |
| Rhizobacteria (*B. subtilis* BA 41, *Streptomyces* spp. SB 19)  Yeasts (*Pichia pastoris* PP59)  Trichoderma fungi (*Trichoderma harzanium* TH01 and *T. viride TV03*) | 7.5%  10.2 x 107 CFU g-1 |
| **EKOprop NX**  **(EKO)** | Mycorrhizal fungi (*Glomus* spp.) | 1% |
| Rhizobacteria (*Bacillus* spp., *Streptomyces* spp., *Pseudomonas* spp.) | 2.3x106 CFU g-1 |
| Rhizosphere fungi (*Arthrobotrys* spp., *Monacrosporium* spp., *Paecilomyces* spp., *Myrothecium* spp.) | 1x106 CFU g-1 |
| Trichoderma fungi (*Trichoderma* spp.) | 5x106 CFU g-1 |
| **Fidelius**  **(FID)** | Mycorrhizal fungi (*Glomus aggregatum, G. intraradices, G. mossae, G. etunicatum*) | 12.0% |
| Rhizobacteria (*Bacillus amyloliquefaciens, B. licheniformis, B. subtilis, B. laterosporus, B. mojavensis*) | 6x106 CFU g-1 |
| Trichoderma fungi (*Trichoderma harzanium, T. koningii*) | 1.5x104 CFU g-1 |
